1           **AMU: Using mRNA Embedding in Self-Attention Network to Predict**  
2                           **Melanoma Immune Checkpoint Inhibitor Response**

3  
4 **Authors:** Yi Yin<sup>1</sup>, Qing Wu<sup>2</sup>, Ziming Wang<sup>2</sup>, Yu Kang<sup>3</sup>, Xianhe Xie<sup>2\*</sup>

5 **Affiliations:**

6 <sup>1</sup> Department of Medical Oncology, Clinical Oncology School of Fujian Medical University,  
7 Fujian Cancer Hospital; Fuzhou, 350014, China;

8 <sup>2</sup> Department of Oncology, Molecular Oncology Research Institute, Fujian Key Laboratory of  
9 Precision Medicine for Cancer, The First Affiliated Hospital of Fujian Medical University;  
10 Fuzhou, 350005, China;

11 <sup>3</sup> School of Information and Communication Engineering, Beijing University of Posts and  
12 Telecommunications, Beijing, 100876, China.

13 **Emails:**

14 Yi Yin: elovf1@fjmu.edu.cn

15 Qing Wu: wuqing@fjmu.edu.cn

16 Ziming Wang: wzmyx20@163.com

17 Yu Kang : ky@bupt.edu.cn

18 \*Corresponding author. Email: xiexianhe@fjmu.edu.cn

19 **Word count:** 3020

20 **Keywords:** deep learning, transformer, self-attention, immunotherapy, representation learning

## 21 **Declarations**

22 **Ethics statements and Patient consent for publication:** Not applicable.

23 **Availability of data and material:** All data and codes are available in

24 <https://aistudio.baidu.com/aistudio/projectdetail/4298990>

25 **Competing interests:** Authors declare that they have no competing interests.

26 **Funding:** No funding

## 27 **Author contributions:**

28 Conceptualization: Yi Yin

29 Methodology: Yi Yin

30 Visualization: Yi Yin, Ziming Wang

31 Project administration: Yi Yin, Xianhe Xie, Yu Kang,

32 Supervision: Xianhe Xie, Yu Kang

33 Writing – original draft: Yi Yin

34 Writing – review & editing: Yi Yin, Qin Wu, Ziming Wang, Xianhe Xie

35 **Acknowledgments:** The authors thank Xiaohua Zhang, Cunxi Li for helpful discussion,

36 Tianxuan Qi for coding enlightenment, Muqun He, Jianfeng Wang and Yunjian Huang

37 for the work incentives, and thanks to Baidu Paddle team for providing free online GPU

38 and training courses to us.

39

## 40 **List of Abbreviations**

41 AI: Artificial Intelligence

42 AUC: The Area Under the Curve

43 CV: Computer Vision  
44 CNN: Convolutional Neural Network  
45 DL: Deep Learning  
46 GNN: Graph Neural Network  
47 GO: Gene Ontology  
48 ICI: Immune Checkpoint Inhibitor  
49 mAP: mean Average Precision  
50 NLP: Natural Language Processing  
51 ORR: Objective Response Rate  
52 PR: Precision-Recall  
53 ROC: receiver operating characteristic curve  
54 SVM: Support Vector Machine  
55 SHAP: SHapley Additive Explanations  
56 TMB: Tumor Mutation Burden  
57 XGBoost: eXtreme Gradient Boosting

58

59 **Abstract:**

60 **Background:** To precisely predict drug response and avoid unnecessary treatment have been  
61 urgent needs to be resolved in the age of melanoma immunotherapy. Deep learning model is a  
62 powerful instrument to predict drug response. Simultaneously extracting the function and  
63 expression data characteristics of mRNA may help to improve the prediction performance of the  
64 model. **Methods:** We designed a deep learning model named AMU with self-attention structure  
65 which were fed with the mRNA expression values for predicting melanoma immune checkpoint  
66 inhibitor clinical responses. **Results:** Comparing with SVM, Random Forest, AdaBoost,  
67 XGBoost and the classic convolutional network, AMU showed the preferred performance with  
68 the AUC of 0.941 and mAP of 0.960 in validation dataset and AUC of 0.672, mAP of 0.800 in  
69 testing dataset, respectively. In model interpretation work, TNF-TNFRSF1A pathway were  
70 indicated as a key pathway to influence melanoma immunotherapy responses. Further, gene  
71 features extracted from embedding layer and calculated by t-SNE algorithm, showed a local  
72 similarity with Functional Protein Association Network (STRING, <https://cn.string-db.org/>), AMU

73 could predict gene functions and interactions simultaneously. **Conclusions:** Deep learning model  
74 built with self-attention structure has strong power to process mRNA expression data and gene  
75 vector representation is a promising work in biomedical field.

76

### 77 **What is already known on this topic**

78 The types of biomarkers for immunotherapy are very complex and transcriptomics biomarker  
79 research is one part of it, but currently it is lack of generally acknowledged results with practical  
80 value. Combining deep learning models with transcriptomics biomarker markers can help us to  
81 predict drug sensitivity. However, the powerful capabilities of deep learning models have not  
82 been fully exploited and utilized.

### 83 **What this study adds**

84 The expression of 160 genes could well predict the efficacy of immunotherapy, even if the tissue  
85 samples were after drug administration, and through model training, we could also extract the  
86 interactions and connections between genes. The deep learning model could not only do  
87 prediction, but were also promising in performing gene vector representation learning.

### 88 **How this study might affect research, practice or policy**

89 Our research is not only to provide a model with high predictive value, but also to extract gene  
90 interaction relations during model training, which is very enlightening for gene vector  
91 representation learning. The research of gene vector representation learning can promote the  
92 prediction accuracy of deep learning models in various biomedical fields because it can become  
93 the common upstream of many biomedical tasks.

94

## 95        **BACKGROUND**

96        The publication of Alexnet in 2012 brought neural network back to researchers'  
97        attention,[1]. After ten years of development, Deep learning (DL), a computer science and  
98        technology with the neural network as the core, has become one of the most active scientific  
99        research fields and the primary technology of artificial intelligence. It takes a big step forward in  
100       the development of artificial intelligence (AI), and promotes great changes and progress in the  
101       fields of industry, agriculture, commerce, economic finance, and medical area etc. Deep  
102       learning-centered artificial intelligence has become a key technology in the new industrial  
103       revolution.

104       DL has developed rapidly in image recognition and image segmentation, and has already  
105       been mature and widely used in industry. In the field of Natural Language Processing (NLP), the  
106       self-attention mechanism was proposed by Google in its famous paper " Attention is All Your  
107       Need" in 2017, which is conducive to integrate the internal association between the input long  
108       sequence data and improve the predictive accuracy of the downstream tasks such as automatic  
109       speech recognition, machine translation etc. Subsequently, the transformer network with self-  
110       attention mechanism as the core architecture was widely proved to be superior and quickly  
111       became one of the acknowledged optimal basic networks. Then the transformer was transplanted  
112       to computer vision (CV) field and models such as ViT and Swin Transformer were proposed,[2,  
113       3], which greatly improved the prediction accuracy of CV tasks. In the medical field, CV model  
114       or NLP model with transformer is also widely used,[4], AI assisted pathological/ imaging  
115       diagnosis and medical data extraction are under accelerated development,[5]. Meanwhile, in the  
116       field of scientific research, Graph neural network (GNN) models is often applied to drug  
117       sensitivity prediction and molecule affinity prediction,[3, 6]. However, AlphaFold2 with self-

118 attention mechanism successfully predicted protein tertiary structure based on protein primary  
119 structure information last year,[7], which is believed that it can greatly improve the efficiency of  
120 protein function studies. For gene multi-omics data, most of current studies feed the data into the  
121 Convolutional Neural Network (CNN) in the form of one hot coding or one-dimensional  
122 vector,[3, 8, 9], which seems lags behind other areas in DL domain. In this study, considering the  
123 interaction and connection among genes, we tried to use transformer encoder structure with self-  
124 attention mechanism to manage gene expression data, which achieved good prediction results  
125 and suggested the feasibility of self-attention mechanism for gene vector representation.

126 We named our DL model AMU, which meant Attention mechanism Model for predicting  
127 melanoma iMMUotherapy checkpoint inhibitor (ICI) response. In recent years, malignancy  
128 immunotherapy had made great progress and significantly improved patients' overall survival,  
129 especially for melanoma, immunotherapy had already acquitted as the standard treatment in the  
130 advanced disease,[10, 11]. However, the clinical tumor response to immunotherapy is not  
131 satisfied, and the objective response rate (ORR), which is the standard assessment criteria for  
132 evaluating anti-tumor drug activation, is around 30%,[12], in some other tumors, the ORR is  
133 even lower, around 10%-20%,[13, 14]. So how to precisely identify which group of patients can  
134 beneficial from immunotherapy has caused much attention,[15-17]. Currently approved  
135 immunotherapy treatment includes PD-1/PD-L1 inhibitor and CTLA-4 inhibitor, the biomarkers  
136 for these drugs are usually PD-L1 expression level, tumor mutation burden (TMB) and MSI-  
137 H/dMMR status, but these biomarkers have low prediction accuracies and often contradict with  
138 each other,[18-20]. The search for more precise methods has not stopped, we considered drug  
139 response is related to complex biological pathways and conducted this study using multi-gene  
140 mRNA expression values to predict ICI response.

141 We summarized our contributions follows :

142 1) In model building and developing level:

- 143 • We provided reliable evidence to reveal the superiority of our model AMU achieving  
144 excellent performance in both validation dataset and independent testing dataset for  
145 melanoma ICI response prediction, highlighting the strong predictive power and  
146 generalization ability of our model.
- 147 • We proved that the self-attention mechanism could work in 1-D vector data, even if the  
148 input data is not spatial positional type image or sequence sensitive type natural language.
- 149 • We discovered the embedding architecture could be used for representation learning of gene  
150 feature and combining mRNA expression quantitative information, the interactions of  
151 learned representation vector had local consistence with the widely accepted Functional  
152 Protein Association Network (STRING, <https://cn.string-db.org/>),[21] which proved the  
153 embedding architecture is suitable and promising for gene vector representation. Self-  
154 attention mechanism was superior and benefit for digitating data inner correlation. The  
155 interpretation of embedding layer made the DL network becoming more convincing, which  
156 was especially important in biomedical area.

157 2) In biological level:

- 158 • According to model interpretation work, we put forward an assumption that the TNF-  
159 TNFRSF1A pathway might be a key pathway to decide melanoma ICI response.
- 160 • CD80 and CCR3 expression may related to both survival and ICI response for melanoma.

161 **METHODS**

162 We collected the open data to build our datasets, AMU performance was evaluated in  
163 validation and testing datasets comparing with other five machine learning models, after the  
164 model was trained, we conducted the interpretation work to explore the importance and  
165 interactions of gene functions. We used DL framework PaddlePaddle 2.3.0 to build AMU and  
166 Paddle AI Studio (<https://aistudio.baidu.com/aistudio/index>) to train model online, figures were  
167 drawn by matplotlib package.

### 168 **Overview of AMU framework**

169 AMU is constructed by a transformer encoder followed with a convolutional network for an  
170 ICI clinical response binary classification task. The input data are 160 normalized mRNA  
171 expression values. As the same as other classification models, the output of AMU is a pair of  
172 probability values, which denotes non-response and response probability. The transformer  
173 encoder structure is classic as that in NLP, which will be described in detail in the following part.  
174 In convolutional network, we used ‘Convolution- Dropout - Batch Normalization - ReLU  
175 activation function - Adaptive Maximum Pool’ strategies. We used Adam algorithm as the  
176 optimizer for back-propagation process and two-step decay of learning rate for training. AMU  
177 takes the SoftMax activation function for the end of the net and cross-entropy as loss function. A  
178 total of 83,462 parameters are trainable in AMU. Details see Supplement (Table S1).

### 179 **mRNA embedding and transformer encoder layer**

180 We set a 20-D gene embedding for gene feature learning, and the initialized embedding  
181 input is integer “1” to ”160”, then we multiply embedded values with mRNA expression values  
182 in order to add expression information to every embedding, this method was inspired by NLP  
183 process in which word position information is added to the embedding layer. We consider that  
184 gene features can be learned in the end-to-end training process just like words can be



185 representation learned in large text corpus. However, gene is not a sequence data so that the  
 186 position information is not necessary and expression information should be instead. Genes have  
 187 interaction and association with each other, so self-attention mechanism will be work.

188 In the process of transplanting transformer encoder layer, no structure needs to be changed,  
 189 which includes Layer normalization, Dropout, Muti-head attention, and Multilayer Perceptron  
 190 (MLP). In model training experiment, we used eight Muti-head attentions and repeated  
 191 transformer encoder layer eight times to avoid underfitting.

## 192 **Building Dataset**

193 As show in Table 5, all the cases fed into models are collected from published data,  
 194 including three independent datasets GSE78220, GSE91061, GSE165278 from GEO Datasets  
 195 and one dataset from the paper of Liu (PMID:31792460),[22-26]. We collected total 206 patients  
 196 diagnosed with advanced melanoma treated with immunotherapy checkpoint inhibitor, including  
 197 Nivolumab, Pembrolizumab and Ipilimumab. The whole-transcriptome sequencing (RNA-seq)  
 198 conducted on pretreatment tumor tissues.

199 The testing dataset was built by 58 post-treatment tissue samples from GSE91061. Clinical  
 200 information is not available in the most datasets and the patients' characteristics cannot be  
 201 described. Datasets detail are shown in **Table 1**.

202

203 **Table 1. Summary of datasets**

| Dataset ID | Patient<br>count | Drug applied | Biopsies type | Sample<br>acquisition | mRNA-seq<br>platform |
|------------|------------------|--------------|---------------|-----------------------|----------------------|
|------------|------------------|--------------|---------------|-----------------------|----------------------|

**Training/Validation dataset** (n = 206)

|                                 |     |                             |                 |                                |                                |
|---------------------------------|-----|-----------------------------|-----------------|--------------------------------|--------------------------------|
| GSE78220                        | 27  | Pembrolizumab               | Melanoma tissue | pre-anti-PD-1<br>therapy       | Illumina HiSeq<br>2000         |
| GSE91061                        | 51  | Nivolumab                   | Melanoma tissue | pre-anti-PD-1<br>therapy       | Illumina<br>Genome<br>Analyzer |
| GSE165278                       | 7   | Ipilimumab                  | Melanoma tissue | pre-anti-<br>CTLA-4<br>therapy | Illumina HiSeq<br>2500         |
| Liu                             | 121 | Nivolumab/<br>Pembrolizumab | Melanoma tissue | pre-anti-PD-1<br>therapy       | Illumina HiSeq<br>2000/ 2500   |
| <b>Testing dataset (n = 58)</b> |     |                             |                 |                                |                                |
| GSE91061                        | 58  | Nivolumab                   | Melanoma tissue | post-anti-PD-<br>1 therapy     | Illumina<br>Genome<br>Analyzer |

204 According to previous studies, 169 genes have been described potential associated with  
205 melanoma, inflammation, immunity, the PD-L1/CTLA4 pathways and ICI response,[27, 28, 29].  
206 Finally, 160 genes were overlapped in four datasets and selected. For response digital  
207 representation, we took records with “complete response (CR)” and “partial response (PR)” as  
208 response (classed as numeric 1), “stable disease (SD)” and “progression disease (PD)” as non-  
209 response (classed as numeric 0). Supplement (Data file S1) lists the full 160 gene names.

210 We calculated the TPM-normalized expression values by the raw data provided by authors.  
211 And continued to normalize the TPM values to constituent ratios, then we selected the 160  
212 values from their original datasets and convert to constituent ratios again. After this step, all the

213 values from different datasets are represent mRNA relative expression quantity and are  
214 comparable. At last, we logarithm them.

215 The last, we applied up sample strategy for data enhancement, positive samples were 1:1  
216 duplicated. A total of 280 samples were in our training/validation dataset including 148 positive  
217 samples and 132 negative samples. We randomly divided the training/ validation dataset into the  
218 training (224) and validation (56) sets, which corresponded to 80% and 20% of the total  
219 instances, respectively. In order to get reliable model performances, we randomly split training  
220 and validation data five times, which will be mentioned as “5-fold cross validation” in the  
221 following part.

## 222 **Competing methods**

223 We chose four machine learning models and designed one simple CNN as competing  
224 methods. All the competing models input data are 160-D vector of mRNA expression values we  
225 have been described.

226 • SVM (Support Vector Machine) is a first-class classification machine learning model. We  
227 employed the grid search strategy to find the optimal model hyperparameter. 'kernel' included  
228 'linear', 'poly' and 'rbf', 'C' was in the list [1, 10, 100], 'gamma' was in the list [1, 0.1, 0.001].

229 • Random forest is a tree-based regressor model. We set the number of trees in the forest  
230 from range (2,10) and 'n\_estimators' from arrange (10,300,10). The best hyperparameters were  
231 chosen in the comparing experiments.

232 •AdaBoostClassifier is a tree-based ensemble model and the best hyperparameters were  
233 chose as the same as Random Forest.

234 • XGBoost (eXtreme Gradient Boosting) is a scalable tree boosting system. It implements  
235 machine learning algorithms under the gradient boosting framework. One of the advantages of  
236 XGBoostClassifier is convenience for model interpretation,[30].

237 • CNN, we built a simple CNN to represent traditional DL model without self-attention  
238 mechanism. The model included three Conv1D layers and total 737 trainable parameters. Details  
239 see Supplement (Table S2).

## 240 **Model evaluation**

241 In classification experiments, AUC and PR curves the two commonly used measurements  
242 were chosen as our classification metrics. To further evaluate the performance of our model, we  
243 demonstrated results under validation dataset and testing dataset respectively. We also used  
244 several common metrics in five-fold cross validations, including accuracy, precision, recall and  
245 f1 score.

## 246 **Model interpretation**

247 We selected SVM, XGBoost and AMU model to explore model interpretation works.

248 For SVM and XGBoost models, we applied SHAP (SHapley Additive Explanations) which  
249 is a game theoretic approach to estimate the gene feature importance, then we used GO pathway  
250 enrichment analysis and overall survival COX analysis to describe the important gene features.

251 For AMU model, Shap also can identify the gene importance, but more information can  
252 analysis through mRNA embedding layer. Just be inspired by NLP word embedding, we take  
253 mRNA embedding layer 20-D trainable parameters as gene features. We tried the cluster analysis  
254 and calculated the Euclidean distance, cosine similarity and t-distributed Stochastic Neighbor  
255 Embedding (t-SNE) among gene feature vectors to describe the gene association and interaction.

256 The we compare the gene correlations with Functional Protein Interaction Network (STRING,  
 257 <https://cn.string-db.org/>) to evaluate the gene feature learned from AMU.

## 258 **RESULTS**

### 259 **AMU accurately predicted melanoma immunotherapy response**

260 We identified the performance of our model on validation and testing datasets comparing  
 261 with currently advanced machine learning models in five-fold cross validations. **Table 2** showed  
 262 the binary classification reports of validation dataset predicted by original training data. DL  
 263 models were not preferred, and SVM had the best performance according to the accuracy score  
 264 (0.633) and recall score (0.633). All the models had unsatisfactory performance. XGBoost model  
 265 get the highest f1-score (0.567) followed by AMU (0.55), the CNN model had the lowest f1-  
 266 score of 0.45.

267  
 268 **Table 2. Classification reports of Amu and five comparing methods for original validation**  
 269 **dataset**

| The mean of five-fold cross validations | SVM          | RandomForest | AdaBoost | XGBoost      | CNN   | AMU          |
|-----------------------------------------|--------------|--------------|----------|--------------|-------|--------------|
| Accuracy                                | <b>0.633</b> | 0.608        | 0.531    | 0.618        | 0.620 | 0.590        |
| Precision                               | 0.512        | 0.471        | 0.435    | 0.553        | 0.500 | <b>0.560</b> |
| Recall                                  | <b>0.633</b> | 0.608        | 0.531    | 0.618        | 0.390 | 0.550        |
| F1-score                                | 0.526        | 0.517        | 0.473    | <b>0.567</b> | 0.450 | 0.550        |

270  
 271 However, after data enhancement, all the model performances were significantly improved  
 272 except CNN (**Table 3**), which was hard to converge. AMU model showed the best performance  
 273 with f1-score 0.93, the area under the curve (AUC) 0.941 and mean average precision (mAP)

274 0.960, respectively. In the testing dataset, AMU also demonstrated superior predictive perform as  
 275 show in **Table 4** and achieved the highest AUC (0.672) and mAP (0.800) respectively. The  
 276 receiver operating characteristic curve (ROC) and Precision-Recall (PR) curve were show in  
 277 **Table 3. Classification reports of Amu and five comparing methods for enhanced validation**  
 278 **dataset**

| <b>The mean of five-fold cross<br/>validations</b> | <b>SVM</b> | <b>RandomForest</b> | <b>AdaBoost</b> | <b>XGBoost</b> | <b>CNN</b> | <b>AMU</b>   |
|----------------------------------------------------|------------|---------------------|-----------------|----------------|------------|--------------|
| Accuracy                                           | 0.884      | 0.653               | 0.821           | 0.792          | 0.544      | <b>0.930</b> |
| Precision                                          | 0.906      | 0.707               | 0.872           | 0.854          | 0.524      | <b>0.930</b> |
| Recall                                             | 0.892      | 0.654               | 0.821           | 0.792          | 0.534      | <b>0.930</b> |
| F1-score                                           | 0.884      | 0.611               | 0.809           | 0.777          | 0.482      | <b>0.928</b> |

279  
 280 **Table 4. Classification reports of Amu and five comparing methods for testing dataset**

|           | <b>SVM</b> | <b>RandomForest</b> | <b>AdaBoost</b> | <b>XGBoost</b> | <b>CNN</b> | <b>AMU</b>  |
|-----------|------------|---------------------|-----------------|----------------|------------|-------------|
| Accuracy  | 0.76       | 0.55                | 0.64            | 0.67           | 0.71       | <b>0.72</b> |
| Precision | 0.38       | 0.45                | 0.46            | 0.44           | 0.59       | <b>0.61</b> |
| Recall    | 0.50       | 0.44                | 0.47            | 0.47           | 0.59       | <b>0.60</b> |
| F1-score  | 0.43       | 0.44                | 0.46            | 0.45           | 0.59       | <b>0.60</b> |

281  
 282 **Model interpretation**  
 283 We listed the top-10 Shap value genes of SVM, XGBoost and AMU (**Table 5**)[31]. The top  
 284 genes were quite different among models. The intersection of these top-10 genes was including

285 TNF and its receptor TNFRSF1A. TNF encodes a multifunctional proinflammatory cytokine.  
 286 TNFRSF1A is a member of the TNF receptor superfamily of proteins. The details of Shap values  
 287 were in Supplementary (Fig S1-3, Data files S2-4).

288

289 **Table 5. Top-10 Shap value genes prioritized by SVM, XGBoost and AMU**

| Module  | Top-10 Shap value genes                                                 |
|---------|-------------------------------------------------------------------------|
| SVM     | TNFRSF1A, SERPINA1, F5, NEDD4L, TLR4, SERPINE1, GYPB, NBEA, BPGM, UBE2C |
| XGBoost | FASLG, CDKN1A, TP53, CD4, CASP3, HMGB1, SLC4A1, TNF, FOS, IL5           |
| AMU     | THBS1, CD86, MIF, BPGM, NRAS, TNF, IL23A, CXCL8, CD40, TNFRSF1A         |

290

291 Gene Ontology (GO) analysis was performed in top-50 genes of these models[32-34], total  
 292 112 genes were gathered, the enrichment analysis of pathways was show in **Figure 3**. The most  
 293 important genes are clustered in lymphocyte proliferation pathway. Then overall survival cox  
 294 analysis of these 112 genes was conducted (**Figure 4**), 17 genes showed statistical significance,  
 295 most genes showed protect effects, only 2 genes (CD 80 and CCR3) had noteworthy hazard  
 296 ratios (HRs) (0.761 and 0.134 respectively). CD 80 protein was activated by the binding of CD28  
 297 or CTLA-4 and then induces T-cell proliferation and cytokine production. CCR3 protein is a  
 298 receptor for C-C type chemokines.

299 Finally, but most important, gene features learned by AMU showed biological significance.  
 300 We found that mRNA embedding matrix was hard to perform a desirable cluster analysis, also,  
 301 the Euclidean distance and cosine similarity algorithm both revealed the gene features distributed  
 302 uniformly and no aggregation. **See details in Supplementary (Fig S4-7, Data file S 5-6)**.  
 303 However, gene association and interaction calculated with t-SNE algorithm showed locally  
 304 similar with STRING. Four cases were visualization in **Figure 5**. For CD4-MAPK14-PTPRC-

305 SOCS1 subgroup, both mRNA embedding and STRING indicated inner close association, and  
306 NEDD9 relatively isolated with them. For PDE3B-ELANE-CXCL8, mRNA embedding  
307 successfully mapped the close distance. In NRAS-LAGLS3-IL10-FCGR2B-CDKN1A-HMGB1  
308 subgroup, most links were accurately figure out with a local difference that STRING showed  
309 CDKN1A -NRAS, but mRNA embedding showed CDKN1A- FCGR2B association. Another  
310 case was in CASP1-TLR9-CXCR3-ITGAL-TXNRD1 subgroup, most links were consistent  
311 except STRING described an interaction with CXCR3-ITGAL, but mRNA embedding didn't  
312 figure it out.

## 313 **DISCUSSION**

314 In industrial 4.0 age, DL has been the most advanced model algorithm. Since the Alexnet  
315 proposed in 2012, convolutional network renewed and a new wave of artificial intelligence  
316 research and applications have begun. Then transformer has been the most advanced deep  
317 learning technique and exhibited powerful performers in CV and NLP areas for its strong  
318 features extraction ability of sequential and spatial interactions of data. AMU is a model  
319 connected the transformer encoder with a convolutional network, it's a successful trial of proving  
320 that the transformer structure is also feasible and superior for 1-D gene expression data (just like  
321 NLP) prediction task and splendid for gene feature learning. AMU also showed superior  
322 performance in testing dataset which tissue biopsies were post ICI and some of the features and  
323 data distribution had to be different from that of pre-ICI, further proved AMU learned some  
324 essential features. Previously, several works have been done in using mRNA expression and  
325 clinical data to predict melanoma ICI response. Noam Auslander etc. reported an AUC of 0.83  
326 with their IMPRES predictor,[35]. Another algorithm proposed by Philip Friedlander etc. was



327 validated in the validation set with AUCs of 0.62,[27]. By this cross-experiment comparison,  
328 AMU exhibited its advantage.

329 Further, features abstracted from embedding layer showed local similarity with laboratory  
330 results or curated databases, indicating strong gene presentation abilities of transformer encoder  
331 should be fully researched and utilized for more gene related downstream tasks. DL studies  
332 should sufficiently take advantage of the power of transformer. Moreover, model interpretation is  
333 quite important for medical studies and obviously gene embedding can facilitate this work.

334 Additionally, in the model interpretation part, SVM, XGBoost and AMU consistently  
335 indicated that TNF- TNFRSF1A axis possess the most important genes related to melanoma ICI  
336 response process. Previous mouse experiments published in Nature showed that anti-PD-1 and  
337 anti-CTLA-4 (NIVO+IPI) combined with TNF- $\alpha$  inhibitors could improve the course of colitis in  
338 a mouse model and enhance the anti-tumor effect,[36]. Phase Ib clinical trial showed the  
339 promising effect of combining Nivolumab and Ipilimumab with TNF- $\alpha$  inhibitor in advanced  
340 melanoma,[37]. These facts indicated machine learning models not only can applied in predictive  
341 scenarios but also can provide suggestive information for further investigation.

342 Our work has several limits:

343 1) sample size was not large enough and the representativeness of samples was inevitably  
344 impaired, meanwhile, the patients' characteristics were not described, which will limit the  
345 extrapolation of the results. It is a common problem in medical deep learning researches because  
346 the data is limited for one specific task and unsupervised learning often works to resolve this  
347 dilemma. For DL, models have strong fitting ability, but sample diversity and distribution decide

348 the model generalization. A larger and closer to real situation training dataset is desired for  
349 robust performance in most cases.

350 2)Although 160 genes were much less than previous studies imported 500-800 genes and  
351 more favorable for model interpretation, we consider that input features can be slimed more  
352 accurately because the ratio of input features and sample numbers should be controlled within a  
353 certain range for a better result according to Ben Sorscher's paper,[38].

354 3)A particular point we had to indicate is that, different from other fields, input features are  
355 almost impossible to be enumerated in medical studies. Taking melanoma ICI response as  
356 example, input data can include multi-omics, clinical, pathological and imaging data etc. Our  
357 study only imported mRNA expression data, which is not complete for feature abstraction.

358 Looking for immunotherapy biomarkers requires multidisciplinary collaboration; our self-  
359 attention model is powerful in extraction and integration of the transcriptome information and  
360 make the drug sensitivity prediction more credible. The nature of gene is information, all kinds  
361 of advanced techniques used to process information can be tried to process gene data. In our  
362 opinion, gene representation learning work should be promising, because it can be used as a  
363 common upstream path for biological information mining and make our target tasks performed  
364 better.

365

366 **Figure 1.** The overview of AMU

367 **Figure. 2.** ROC and PR in validation dataset. (A) and (B) respectively shows ROC curve and PR  
368 curve with 6 models for validatio dataset. The PR curve shows mean average precision (mAP) of  
369 2 classes. (C) and (D) respectively shows ROC curve and PR curve for testing dataset.

370 **Figure 3.** GO pathways enrichment analysis.

371 (A): GO results of three ontologies. (B): Biological process of pathways enrichment.

372 **Figure 4.** Cox analysis of Top-50 Shap value genes of (SVM, XGB, AMU) models (genes of  
373 p values <0.05)

374 **Figure 5.** Gene interaction learned by AMU and compared with STRING

375 (A): NRAS-LAGLS3-IL10-FCGR2B-CDKN1A-HMGB

376 (B): CASP1-TLR9-CXCR3-ITGAL-TXNRD1

377 (C): PDE3B-ELANE-CXCL8

378 (D) CD4-MAPK14-PTPRC-SOCS1

379

### 380 **List of Supplementary Materials**

381 Fig. S1: SVM Top-20 Shap gene values

382 Fig. S2: XGBoost Top-20 Shap gene values

383 Fig. S1: AMU Top-20 Shap gene values

384 Fig. S4: Clustering analysis of AMU gene embeddings

385 Fig. S5: Heatmap of Euclidean distance of AMU gene embeddings

386 Fig. S6 Heatmap of cosine similarity of AMU gene embeddings

387 Fig. S7: Bar chart of cosine similarity of AMU gene embeddings

388 Table S1: Summary of AMU framework

389 Table S2: Summary of CNN framework

390 Data files S1: 160 gene names

391 Data files S2: SVM Shap values  
392 Data files S3: XGBoost Shap values  
393 Data files S4: AMU Shap values  
394 Data files S5: Euclidean distance of AMU gene embeddings  
395 Data files S6: cosine similarity of AMU gene embeddings

396  
397

## 398 **References**

- 399 1. Krizhevsky A, Sutskever I, Hinton G E. Imagenet classification with deep convolutional neural networks.  
400 Communications of the ACM, 2017, 60(6): 84-90.
- 401 2. Dosovitskiy A, Beyer L, Kolesnikov A, et al. An image is worth 16x16 words: Transformers for image  
402 recognition at scale. arXiv preprint arXiv:2010.11929, 2020.
- 403 3. Liu Z, Lin Y, Cao Y, et al. Swin transformer: Hierarchical vision transformer using shifted  
404 windows[C]//Proceedings of the IEEE/CVF International Conference on Computer Vision. 2021: 10012-  
405 10022.
- 406 4. Devlin J, Chang M W, Lee K, et al. Bert: Pre-training of deep bidirectional transformers for language  
407 understanding. 2018. arXiv preprint arXiv:1810.04805.
- 408 5. Li J, Chen J, Tang Y, et al. Transforming medical imaging with Transformers? A comparative review of key  
409 properties, current progresses, and future perspective. 2022. arXiv preprint arXiv:2206.01136.
- 410 6. Zuo Z, Wang P, Chen X, Tian L, Ge H, Qian D. SWnet: a deep learning model for drug response prediction  
411 from cancer genomic signatures and compound chemical structures. *BMC Bioinformatics*. 2021;22(1):434.  
412 Published 2021 Sep 10. doi:10.1186/s12859-021-04352-9
- 413 7. Cramer P. AlphaFold2 and the future of structural biology. *Nat Struct Mol Biol*. 2021;28(9):704-705.  
414 doi:10.1038/s41594-021-00650-1
- 415 8. Liu Q, Hu Z, Jiang R, Zhou M. DeepCDR: a hybrid graph convolutional network for predicting cancer drug

- 416 response. *Bioinformatics*. 2020;36(Suppl\_2):i911-i918. doi:10.1093/bioinformatics/btaa822
- 417 9. He D, Xie L. A Cross-Level Information Transmission Network for Hierarchical Omics Data Integration  
418 and Phenotype Prediction from a New Genotype. *Bioinformatics*. 2021 Aug 13;38(1):204–10. doi:  
419 10.1093/bioinformatics/btab580.
- 420 10. Dummer R, Hauschild A, Santinami M, et al. Five-Year Analysis of Adjuvant Dabrafenib plus Trametinib  
421 in Stage III Melanoma. *N Engl J Med*. 2020;383(12):1139-1148. doi:10.1056/NEJMoa2005493
- 422 11. Eggermont AMM, Blank CU, Mandalà M, et al. Adjuvant pembrolizumab versus placebo in resected stage  
423 III melanoma (EORTC 1325-MG/KEYNOTE-054): distant metastasis-free survival results from a double-  
424 blind, randomised, controlled, phase 3 trial. *Lancet Oncol*. 2021;22(5):643-654. doi:10.1016/S1470-  
425 2045(21)00065-6.
- 426 12. Weber JS, Gibney G, Sullivan RJ, et al. Sequential administration of nivolumab and ipilimumab with a  
427 planned switch in patients with advanced melanoma (CheckMate 064): an open-label, randomised, phase 2  
428 trial [published correction appears in *Lancet Oncol*. 2016 Jul;17 (7):e270]. *Lancet Oncol*. 2016;17(7):943-  
429 955. doi:10.1016/S1470-2045(16)30126-7
- 430 13. Janjigian YY, Bendell J, Calvo E, et al. CheckMate-032 Study: Efficacy and Safety of Nivolumab and  
431 Nivolumab Plus Ipilimumab in Patients With Metastatic Esophagogastric Cancer [published correction  
432 appears in *J Clin Oncol*. 2019 Feb 10;37(5):443]. *J Clin Oncol*. 2018;36(28):2836-2844.  
433 doi:10.1200/JCO.2017.76.6212
- 434 14. Brahmer JR, Tykodi SS, Chow LQ, et al. Safety and activity of anti-PD-L1 antibody in patients with  
435 advanced cancer. *N Engl J Med*. 2012;366(26):2455-2465. doi:10.1056/NEJMoa1200694
- 436 15. Rozeman EA, Hoefsmit EP, Reijers ILM, et al. Survival and biomarker analyses from the OpACIN-neo and  
437 OpACIN neoadjuvant immunotherapy trials in stage III melanoma. *Nat Med*. 2021;27(2):256-263.  
438 doi:10.1038/s41591-020-01211-7
- 439 16. Zeng D, Wu J, Luo H, et al. Tumor microenvironment evaluation promotes precise checkpoint  
440 immunotherapy of advanced gastric cancer. *J Immunother Cancer*. 2021;9(8):e002467. doi:10.1136/jitc-  
441 2021-002467
- 442 17. Marabelle A, Fakih M, Lopez J, et al. Association of tumour mutational burden with outcomes in patients  
443 with advanced solid tumours treated with pembrolizumab: prospective biomarker analysis of the

- 444 multicohort, open-label, phase 2 KEYNOTE-158 study. *Lancet Oncol.* 2020;21(10):1353-1365.  
445 doi:10.1016/S1470-2045(20)30445-9
- 446 18. Janjigian YY, Shitara K, Moehler M, et al. First-line nivolumab plus chemotherapy versus chemotherapy  
447 alone for advanced gastric, gastro-oesophageal junction, and oesophageal adenocarcinoma (CheckMate  
448 649): a randomised, open-label, phase 3 trial. *Lancet.* 2021;398(10294):27-40. doi:10.1016/S0140-  
449 6736(21)00797-2
- 450 19. Diaz LA Jr, Shiu KK, Kim TW, et al. Pembrolizumab versus chemotherapy for microsatellite instability-  
451 high or mismatch repair-deficient metastatic colorectal cancer (KEYNOTE-177): final analysis of a  
452 randomised, open-label, phase 3 study. *Lancet Oncol.* 2022;23(5):659-670. doi:10.1016/S1470-  
453 2045(22)00197-8
- 454 20. Hellmann MD, Ciuleanu TE, Pluzanski A, et al. Nivolumab plus Ipilimumab in Lung Cancer with a High  
455 Tumor Mutational Burden. *N Engl J Med.* 2018;378(22):2093-2104. doi:10.1056/NEJMoa1801946
- 456 21. Szklarczyk D, Gable AL, Nastou KC, et al. The STRING database in 2021: customizable protein-protein  
457 networks, and functional characterization of user-uploaded gene/measurement sets [published correction  
458 appears in *Nucleic Acids Res.* 2021 Oct 11;49(18):10800]. *Nucleic Acids Res.* 2021;49(D1):D605-D612.  
459 doi:10.1093/nar/gkaa1074.
- 460 22. Liu D, Schilling B, Liu D, et al. Integrative molecular and clinical modeling of clinical outcomes to PD1  
461 blockade in patients with metastatic melanoma [published correction appears in *Nat Med.* 2020  
462 Jul;26(7):1147]. *Nat Med.* 2019;25(12):1916-1927. doi:10.1038/s41591-019-0654-5
- 463 23. Barrett T, Wilhite SE, Ledoux P, et al. NCBI GEO: archive for functional genomics data sets--  
464 update. *Nucleic Acids Res.* 2013;41(Database issue):D991-D995. doi:10.1093/nar/gks1193
- 465 24. Hugo W, Zaretsky JM, Sun L, et al. Genomic and Transcriptomic Features of Response to Anti-PD-1  
466 Therapy in Metastatic Melanoma [published correction appears in *Cell.* 2017 Jan 26;168(3):542]. *Cell.*  
467 2016;165(1):35-44. doi:10.1016/j.cell.2016.02.065
- 468 25. Zappasodi R, Serganova I, Cohen IJ, et al. CTLA-4 blockade drives loss of T<sub>reg</sub> stability in glycolysis-low  
469 tumours. *Nature.* 2021;591(7851):652-658. doi:10.1038/s41586-021-03326-4
- 470 26. Riaz N, Havel JJ, Makarov V, et al. Tumor and Microenvironment Evolution during Immunotherapy with  
471 Nivolumab. *Cell.* 2017;171(4):934-949.e16. doi:10.1016/j.cell.2017.09.028

- 472 27. Friedlander P, Wassmann K, Christenfeld AM, et al. Whole-blood RNA transcript-based models can predict  
473 clinical response in two large independent clinical studies of patients with advanced melanoma treated with  
474 the checkpoint inhibitor, tremelimumab. *J Immunother Cancer*. 2017;5(1):67. Published 2017 Aug 15.  
475 doi:10.1186/s40425-017-0272-z
- 476 28. Luo Y, Robinson S, Fujita J, et al. Transcriptome profiling of whole blood cells identifies PLEK2 and  
477 C1QB in human melanoma. *PLoS One*. 2011;6(6):e20971. doi:10.1371/journal.pone.0020971
- 478 29. Saenger Y, Magidson J, Liaw B, et al. Blood mRNA expression profiling predicts survival in patients  
479 treated with tremelimumab. *Clin Cancer Res*. 2014;20(12):3310-3318. doi:10.1158/1078-0432.CCR-13-  
480 2906
- 481 30. T. Chen, C. Guestrin, XGBoost: A Scalable Tree Boosting System. Proceedings of the 22nd ACM SIGKDD  
482 International Conference on Knowledge Discovery and Data Mining, San Francisco, 13-17 August, 2016,  
483 785-794. <https://doi.org/10.1145/2939672.2939785>
- 484 31. Scott M. Lundberg, Su-In Lee. A Unified Approach to Interpreting Model Predictions. *Advances in Neural*  
485 *Information Processing Systems 30 (NIPS)*. 2017(30).
- 486 32. Ashburner M, Ball CA, Blake JA, et al. Gene ontology: tool for the unification of biology. The Gene  
487 Ontology Consortium. *Nat Genet*. 2000;25(1):25-29. doi:10.1038/75556.
- 488 33. Mi H, Muruganujan A, Ebert D, Huang X, Thomas PD. PANTHER version 14: more genomes, a new  
489 PANTHER GO-slim and improvements in enrichment analysis tools. *Nucleic Acids Res*.  
490 2019;47(D1):D419-D426. doi:10.1093/nar/gky1038
- 491 34. Gene Ontology Consortium. The Gene Ontology resource: enriching a GOld mine. *Nucleic Acids Res*.  
492 2021;49(D1):D325-D334. doi:10.1093/nar/gkaa1113
- 493 35. Auslander N, Zhang G, Lee JS, et al. Robust prediction of response to immune checkpoint blockade  
494 therapy in metastatic melanoma [published correction appears in *Nat Med*. 2018 Dec;24(12):1942]. *Nat*  
495 *Med*. 2018;24(10):1545-1549. doi:10.1038/s41591-018-0157-9
- 496 36. Perez-Ruiz E, Minute L, Otano I, et al. Prophylactic TNF blockade uncouples efficacy and toxicity in dual  
497 CTLA-4 and PD-1 immunotherapy. *Nature*. 2019;569(7756):428-432. doi:10.1038/s41586-019-1162-y
- 498 37. Montfort A, Filleron T, Virazels M, et al. Combining Nivolumab and Ipilimumab with Infliximab or  
499 Certolizumab in Patients with Advanced Melanoma: First Results of a Phase Ib Clinical Trial. *Clin Cancer*

500 *Res.* 2021;27(4):1037-1047. doi:10.1158/1078-0432.CCR-20-3449

501 38. Ben Sorscher,Robert Geirhos,Shashank Shekhar,Surya Ganguli. Beyond neural scaling laws: beating power  
502 law scaling via data pruning. 2022. arXiv:2206.14486
